# Supplementary material for: Physiological changes in Chlamydomonas reinhardtii after 1000 generations of selection of cadmium exposure at environmentally relevant concentrations
Source: Royal Society of Chemistry journal article supplement (doi:10.1039/c8em00106e), 2018-01-01
Supplement: c8em00106e1.pdf [file c8em00106e1.pdf]

**Physiological changes in *Chlamydomonas reinhardtii* after 1,000  
generations selection of cadmium exposure at environmentally  
relevant concentrations**

Zhen Yu<sup>#1</sup>, Huiling Wei<sup>#1</sup>, Rui Hao<sup>#1</sup>, Huashuo Chu<sup>#2,3</sup>, Yi Zhu<sup>\*1</sup>

<sup>1</sup>College of Food Science and Nutritional Engineering, China Agricultural University, Beijing 100083, China;

<sup>2</sup>State Key Laboratory of Environmental Geochemistry, Institute of Geochemistry, Chinese Academy of Sciences,  
Guiyang, 550081, China;

<sup>3</sup>University of the Chinese Academy of Sciences, Beijing, 100049, China

<sup>#</sup> These authors contributed equally to this work

<sup>\*</sup>Corresponding author

E-mail address: zhuyi@cau.edu.cn (Yi Zhu)

**1. Table S1.** Composition of TAP medium

| Component                                          | Concentration ( $\mu\text{M L}^{-1}$ ) | Component                                                                          | Concentration ( $\mu\text{M L}^{-1}$ ) |
|----------------------------------------------------|----------------------------------------|------------------------------------------------------------------------------------|----------------------------------------|
| (HOCH <sub>2</sub> ) <sub>3</sub> CNH <sub>2</sub> | 20000                                  | MnCl <sub>2</sub> ·4H <sub>2</sub> O                                               | 25.57                                  |
| K <sub>2</sub> HPO <sub>4</sub>                    | 620.08                                 | CoCl <sub>2</sub> ·6H <sub>2</sub> O                                               | 6.77                                   |
| KH <sub>2</sub> PO <sub>4</sub>                    | 411.49                                 | CuSO <sub>4</sub> ·5H <sub>2</sub> O                                               | 6.28                                   |
| NH <sub>4</sub> Cl                                 | 7478.03                                | Mo <sub>7</sub> O <sub>24</sub> (NH <sub>4</sub> ) <sub>6</sub> ·4H <sub>2</sub> O | 0.89                                   |
| MgSO <sub>4</sub> ·7H <sub>2</sub> O               | 405.73                                 | FeSO <sub>4</sub> ·7H <sub>2</sub> O                                               | 17.95                                  |
| CaCl <sub>2</sub> ·2H <sub>2</sub> O               | 340.09                                 | Na <sub>2</sub> EDTA                                                               | 134.32                                 |
| H <sub>3</sub> BO <sub>3</sub>                     | 184.38                                 | CH <sub>3</sub> COOH                                                               | 17468                                  |
| ZnSO <sub>4</sub> ·7H <sub>2</sub> O               | 76.51                                  |                                                                                    |                                        |

**2. Table S2.** Concentrations of total Cd, predicted concentrations of free Cd ions, and predicted major Cd species in TAP medium, calculated using Visual MINTEQ version 3.0.

| Total Cd concentration    | Predicted free Cd ion concentration ( $\mu\text{M L}^{-1}$ ) | Predicted major species (% of total) |
|---------------------------|--------------------------------------------------------------|--------------------------------------|
| 4.92 $\mu\text{g L}^{-1}$ | $6.697 \times 10^{-6}$                                       | CdEDTA <sup>-2</sup> (99.935%)       |
|                           |                                                              | Cd <sup>2+</sup> (0.015%)            |
|                           |                                                              | CdHEDTA <sup>-</sup> (0.014%)        |
|                           |                                                              | CdHPO <sub>4</sub> (aq) (0.012%)     |
|                           |                                                              | Cd·Acetate <sup>+</sup> (0.012%)     |
| 49.2 $\mu\text{g L}^{-1}$ | $7.134 \times 10^{-5}$                                       | CdEDTA <sup>-2</sup> (99.932%)       |
|                           |                                                              | Cd <sup>2+</sup> (0.016%)            |
|                           |                                                              | CdHEDTA <sup>-</sup> (0.014%)        |
|                           |                                                              | CdHPO <sub>4</sub> (aq) (0.013%)     |
|                           |                                                              | Cd·Acetate <sup>+</sup> (0.013%)     |
| 4.92 $\text{mg L}^{-1}$   | 0.59                                                         | CdEDTA <sup>-2</sup> (95.495%)       |
|                           |                                                              | Cd <sup>2+</sup> (1.348%)            |
|                           |                                                              | Cd·Acetate <sup>+</sup> (1.087%)     |
|                           |                                                              | CdHPO <sub>4</sub> (aq) (1.023%)     |

---

$\text{CdCl}^+$  (0.6%)

$\text{Cd-Tris}^{+1}$  (0.263%)

$\text{Cd}(\text{Acetate})_2$  (aq)  
(0.088%)

---

$\text{CdSO}_4$  (aq) (0.046%)
